# Supplementary material for: Hybrid Tamm and quasi-BIC microcavity modes
Source: Royal Society of Chemistry journal article supplement (doi:10.1039/d3nr03241h), 2023-01-01
Supplement: d3nr03241h1.pdf [file d3nr03241h1.pdf]

# Hybrid Tamm and quasi-BIC microcavity modes

D. S. Buzin,<sup>†,‡</sup> P. S. Pankin,<sup>\*,†,‡</sup> D. N. Maksimov,<sup>†,‡</sup> G. A. Romanenko,<sup>¶,†,§</sup>  
V. S. Sutormin,<sup>†,‡</sup> S. V. Nabol,<sup>†,‡</sup> F. V. Zelenov,<sup>||,§</sup> A. N. Masyugin,<sup>||,§,‡</sup>  
M. N. Volochaev,<sup>‡,†</sup> S. Ya. Vetrov,<sup>‡,†</sup> and I. V. Timofeev<sup>†,‡</sup>

<sup>†</sup>*Kirensky Institute of Physics, Federal Research Center KSC SB RAS, Krasnoyarsk,  
660036 Russia*

<sup>‡</sup>*Siberian Federal University, Krasnoyarsk, 660041 Russia*

<sup>¶</sup>*Krasnoyarsk Scientific Center, Siberian Branch, Russian Academy of Sciences,  
Krasnoyarsk, 660036 Russia*

<sup>§</sup>*Siberian State University of Science and Technology, Krasnoyarsk, 660037 Russia*

<sup>||</sup>*AO NPP Radiosvyaz, Krasnoyarsk, 660021 Russia*

E-mail: pavel-s-pankin@iph.krasn.ru

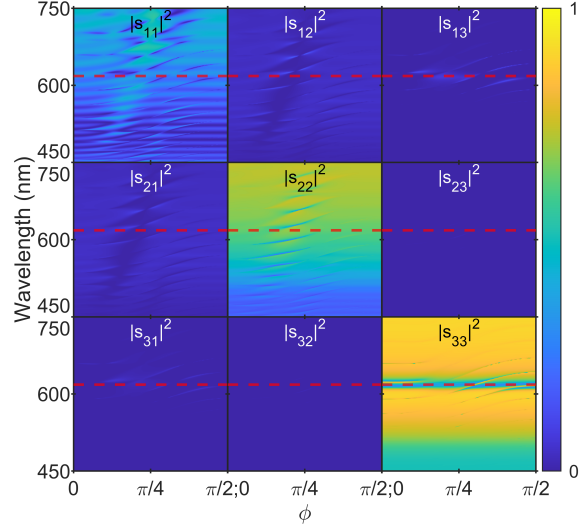

Figure S1. Numerical scattering coefficients of the microcavity corresponding to Fig.5 in the main text.

|                   |                             | Governing parameter    |               |                             | Operating side | Incident light polarization |
|-------------------|-----------------------------|------------------------|---------------|-----------------------------|----------------|-----------------------------|
|                   |                             | $\phi; (0 - \pi/2)rad$ | $U; (0 - 7)V$ | $\Delta T; (0 - 7)^\circ C$ |                |                             |
| Ref. <sup>1</sup> | $ \Delta\lambda_0 ^*$       | -                      | 57            | 7.5                         | PhC            | TM<br>TE                    |
|                   | $\Delta\lambda_{max}^{**}$  | -                      | 5             | 4                           |                |                             |
|                   | $\Delta\lambda_{min}^{***}$ | -                      | 5             | 4                           |                |                             |
| Ref. <sup>2</sup> | $ \Delta\lambda_0 $         | 60                     | -             | -                           | PhC            | TM                          |
|                   | $\Delta\lambda_{max}$       | 24                     | -             | -                           |                |                             |
|                   | $\Delta\lambda_{min}$       | 14                     | -             | -                           |                |                             |
| Ref. <sup>3</sup> | $ \Delta\lambda_0 $         | 43                     | -             | 5                           | PhC            | TM                          |
|                   | $\Delta\lambda_{max}$       | 16                     | -             | 10                          |                |                             |
|                   | $\Delta\lambda_{min}$       | 12                     | -             | 7                           |                |                             |
| This work         | $ \Delta\lambda_0 $         | 70                     | 20            | 5                           | PhC<br>Au      | TM<br>TE                    |
|                   | $\Delta\lambda_{max}$       | 24                     | 14            | 16                          |                |                             |
|                   | $\Delta\lambda_{min}$       | 12                     | 7             | 10                          |                |                             |

\* Resonant line position shift (nm); \*\* Minimal FWHM (nm); \*\*\* Maximal FWHM (nm)

Table S1. Comparison of PhC/LC/Metal device performances.

## References

- (1) Pankin, P.; Sutormin, V.; Gunyakov, V.; Zelenov, F.; Tambasov, I.; Masyugin, A.; Volochaev, M.; Baron, F.; Chen, K.; Zyryanov, V. Y., et al. Experimental implementation of tunable hybrid Tamm-microcavity modes. *Applied Physics Letters* **2021**, *119*, 161107.
- (2) Pankin, P.; Wu, B.-R.; Yang, J.-H.; Chen, K.-P.; Timofeev, I.; Sadreev, A. One-dimensional photonic bound states in the continuum. *Communications Physics* **2020**, *3*, 1–8.
- (3) Wu, B.-R.; Yang, J.-H.; Pankin, P. S.; Huang, C.-H.; Lee, W.; Maksimov, D. N.; Timofeev, I. V.; Chen, K.-P. Quasi-Bound States in the Continuum with Temperature-Tunable Q Factors and Critical Coupling Point at Brewster's Angle. *Laser & Photonics Reviews* **2021**, *15*, 2000290.
